# Supplementary material for: The Structural Characterization and Antipathogenic Activities of Quinoin, a Type 1 Ribosome-Inactivating Protein from Quinoa Seeds
Source: MDPI journal article supplement (doi:10.3390/ijms22168964), 2021-08-20

## SUPPORTING INFORMATION

### The Structural Characterization and Antipathogenic Activities of Quinoin, a Type 1 Ribosome-Inactivating Protein from Quinoa Seeds

Sara Ragucci <sup>a</sup>, Daniela Bulgari <sup>b</sup>, Nicola Landi <sup>a</sup>, Rosita Russo <sup>a</sup>, Angela Clemente <sup>a</sup>, Mariangela Valletta <sup>a</sup>, Angela Chambery <sup>a</sup>, Emanuela Gobbi <sup>b</sup>, Franco Faoro <sup>c</sup>, Antimo Di Maro <sup>a, \*</sup>

<sup>a</sup> Department of Environmental, Biological and Pharmaceutical Sciences and Technologies (DiSTABiF), University of Campania ‘Luigi Vanvitelli’, Via Vivaldi 43, I-81100 Caserta, Italy

<sup>b</sup> Agri-food and Environmental Microbiology Platform (PiMiAA), Department of Molecular and Translational Medicine, University of Brescia, Viale Europa, 11, 25123, Brescia, Italy

<sup>c</sup> Department of Agricultural and Environmental Sciences, University of Milan, Via Celoria 2, 20133 Milan, Italy

\* Corresponding author: e-mail: antimo.dimaro@unicampania.it (ADM); Tel: +39 0823 274409, ORCID ID: <http://orcid.org/0000-0002-9595-9665>.

**Fig. S1.** Purification of RIPs from *C. quinoa* seeds. (a), Elution profile from the CM-Sepharose chromatography showing three main active peaks. (b) and (c), re-chromatography FPLC elution profiles of peak 1 and peak 2, respectively, on an AKTA Purifier System from cation exchange chromatography using a Source 15S PE 4.6/100 column. Experimental conditions are described in the Material and Methods.

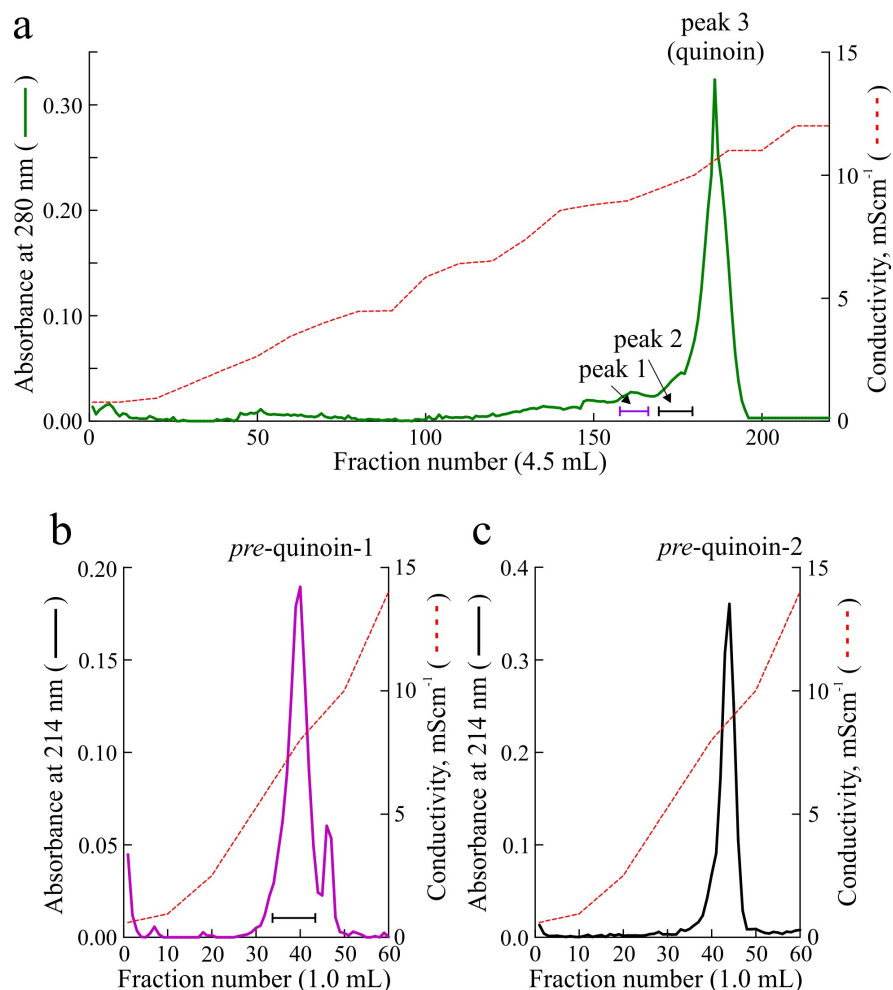

**Table S1.** Accession numbers, species and common names of ribosome inactivating proteins sequences used in this work for primary structure analyses.

|    | Accession number | Species                           | name            | Identity/Similarity (%) compared to quinoia | Note    |
|----|------------------|-----------------------------------|-----------------|---------------------------------------------|---------|
| 1  | Q03464           | <i>Phytolacca americana</i> L.    | PAP-alpha       | 40.94/48.81                                 |         |
| 2  | P34967           | <i>Phytolacca dioica</i> L.       | PD-S2           | 38.97/47.24                                 |         |
| 3  | P84854           | <i>Phytolacca dioica</i> L.       | PD-L3/4         | 39.37/48.42                                 |         |
| 4  | P84853           | <i>Phytolacca dioica</i> L.       | PD-L1/2         | 38.58/46.06                                 |         |
| 5  | P23339           | <i>Phytolacca americana</i> L.    | PAP-S           | 38.58/46.45                                 |         |
| 6  | P10297           | <i>Phytolacca americana</i> L.    | PAP-I           | 36.61/46.06                                 |         |
| 7  | Q6EH50           | <i>Phytolacca heterotepala</i> L. | heterotepalin-4 | 35.82/44.48                                 |         |
| 8  | Q40772           | <i>Phytolacca americana</i> L.    | PAP-II          | 35.82/42.51                                 |         |
| 9  | P85208           | <i>Phytolacca dioica</i> L.       | dioicin-2       | 33.07/42.12                                 |         |
| 10 | P20656           | <i>Saponaria officinalis</i> L.   | saporin-6       | 29.24/35.17                                 |         |
| 11 | P27559           | <i>Saponaria officinalis</i> L.   | saporin-2       | 27.55/33.85                                 |         |
| 12 | Q41391           | <i>Saponaria officinalis</i> L.   | saporin-7       | 28.85/34.78                                 |         |
| 13 | P24476           | <i>Dianthus caryophyllus</i>      | dianthin-30     | 28.74/36.61                                 |         |
| 14 | Q41389           | <i>Saponaria officinalis</i> L.   | saporin-5       | 27.66/33.59                                 |         |
| 15 | Q7M1Z2           | <i>Saponaria officinalis</i> L.   | saporin-9       | 26.87/33.99                                 |         |
| 16 | P85101           | <i>Silene chalcidonica</i> L.     | lychnin         | 27.77/34.18                                 |         |
| 17 | P27560           | <i>Saponaria officinalis</i> L.   | saporin-3       | 26.69/32.20                                 |         |
| 18 | P21326           | <i>Mirabilis jalapa</i> L.        | MAP-S           | 24.00/31.20                                 |         |
| 19 | P02879           | <i>Ricinus communis</i> L.        | ricin           | 24.01/33.85                                 | A-chain |
| 20 | P06750           | <i>Ricinus communis</i> L.        | agglutinin      | 23.62/32.28                                 | A-chain |

**Fig. S2.** Alignment of the amino acid sequences of the six proteins retrieved in *C. quinoa* genome classified as ‘protein synthesis inhibitor like’. A.C.: XP\_021750597.1, protein synthesis inhibitor PD-S2-like; A.C.: XP\_021750694.1, ribosome inactivating protein PD-L3/PD-L4-like; A.C.: XP\_021737780.1, protein synthesis inhibitor PD-S2-like\_(2); A.C.: XP\_021726635.1, ribosome inactivating protein PD-L3/PD-L4-like; A.C.: XP\_021735486.1, antiviral protein MAP-like; A.C.: XP\_021750669.1. Identical residues (\*), conserved substitutions (:), and semi-conserved substitutions (.) are reported.

```
XP_021750597.1 -----
XP_021750694.1 -----
XP_021737780.1 -----
XP_021726635.1 -----
XP_021735486.1 -----
XP_021750669.1 PVMAATFKKKRYLKGSEGGTITIGKCLKSKTYLISNKMLLLMLMWYCGDGTNYLSKV
```

```

XP_021750597.1 -----MQQENKKAWLVTIAIWVVLQQVNAADVTFKLEPKPTQNTYNTFLQSI
XP_021750694.1 -----MNGIQTIMRAFFVVAISTWLVLKPTFAASDLSFDTNPAATTYSKLLSDL
XP_021737780.1 -----MVGIKKFKIVSAVVVAVAVMMVLEPTLAASDFTFDIEGATTDYSKLLTDV
XP_021726635.1 -----MVGIVMGACVVAIVAIVMMVLEPTLAASDIRISFDVEGATATYSQLNDV
XP_021735486.1 --MKLLAAPLSVIWVWCMMVMAVVPPLTAQDRETLYSTVTFELTNGVTGYSSFLTRL
XP_021750669.1 NKGSMKLLAAPISVIWVWCMMVMAVVPPLTAQDGETLAYSTVTFELTNGVTGYQSFLTRL
::: : * : * :

```

```

XP_021750597.1      RSQTKDPSLVYEG---IPMIRPPTNPDTYLLVDLESKKDKNEIFVTLLALSRNDLYVVAFA
XP_021750694.1      RNLVKDKPKLYKG--TNVPVMAAT-FKKKYILVLDLKGSEGGTIITALNLNN---DIYVVGYL
XP_021737780.1      RNKVKDKDKIVYGGRKDIPVMAAPSAAKKYLYVDFLTASEGRITITAVNLNSDNFLNVIAYL
XP_021726635.1      RNKVKDKNIVYGGGLKDLPVMAAP--SDNLYLVDLTASQKRTITLAVNLNKGFSLYIAYL
XP_021735486.1      RNRVEAP---TRACTLQSTRNPPLTGAEYVLVDLKISNTQQWVLGLIDAK---DLYVWAYQ
XP_021750669.1      RNQVESP---TRACTLQSTRNPPLTGAEYVLVDLKISNTQQWVLGLIDAK---DLYVWAYQ
*   .   :   :   :   :   :   :   :   :   :   :   :   :   :   :   :   :
*   .   :   :   :   :   :   :   :   :   :   :   :   :   :   :   :   :

```

```

XP_021750597.1      D--KFGGKVRGHFFSNLNIDTIDKAKKVFEVQVFINITYGESYSQIESNAGTN-RLSFP
XP_021750694.1      D--KLNGNFRSHIFKDPADSAKDTDLFPEATGKN-RLTIN YKSSYADIESNAGVSSRARVG
XP_021737780.1      D--KINGNFRSHIFKDLPPDVQEGFLFRDATGAANRLIMNYGSSYAEVEKAGS--RTKLG
XP_021726635.1      D--KINGNFRSHIFKDLPNNVKDNLFPEAGKANRLIMNYKSDYASIESKAGS--RNKLG
XP_021735486.1      DNVKYN GK YRANFLSDAPQAAKDRLFPGSTKR---TTRFGGNYNSLEPAAGTT-RKNLV
XP_021750669.1      DNVKYN GK YRATFLNDAPQAAKDRLFPGSTQR---TTRFGGNYNSLEPAAGTT-RKNLV
*   *   *   *   *   :   :   :   :   :   :   :   :   :   :   :

```

```

XP_021750597.1      LGFDNLKTYMEKVYGMDTKAKDYSKTEARFLLIAIQMVAEAAARFKYIQGRAIVTTNPNN-
XP_021750694.1      LGVKPLNKFINDVYGKALVVKN----EAQFMLVVIQMVSEATRFKYIESMILEKFADSY-
XP_021737780.1      LGKKPLSKFFDKVYGLVDN-----EAKFMLIVMQMLSEATRFAYIEQMIVQKFEIN-
XP_021726635.1      LGKQPLNIFFNKVGKPVDDKN----QAKFMLVVMQMVSEATRFAYIENMIVQKFEQDIN
XP_021735486.1      LGIQNLDGAIRNVYNKQSESLNKGTTNEARFLLIAIQMVPEAARFKFMQEAIVRGDNDS-
XP_021750669.1      LGIQNLDGAIARKVYNKQSESLNKGTTDEARFLLIAIQMVPEAARFRFMQEAIVRGDNDS-
**      *      :      **      :      :      :      :      :      :      :

```

```

XP_021750597.1      -----YKILSLENNWGAISKGIRNAVKKV-----INPALILQYPNGTTTWTVTQVSDIKN
XP_021750694.1      ---NPDPKAMRLERWSKISKGIKDSKKGV-----ISPELDLDKVDNDKWVKTKVEDIAG
XP_021737780.1      ECKYKPDCLKITELKSWQKITVGIKNSNGV-----ICPPLKLDQPTGNPVIWSSVNEIAG
XP_021726635.1      ECYKPDFKMTIEKLSWQKITVGIKNSKGGE-----IKPQLDLGRPNNEFPWPVTRVDQIAK
XP_021735486.1      ----FKKKMVAFQNDWDPISQAIHKAEAAATPKCVTITPTLIISN-VDYRQEVNRVDEIKN
XP_021750669.1      ----FKKKMVAFQNDWDPISQAIHKAEAAATPKCVTITPTLIISN-IDYRQEVNRVDEIKN
*   :   :   *   :   :   :   :   :   :   :   :   :   :   :   :   :

```

```

XP_021750597.1      DMGLLLKYVM-----
XP_021750694.1      DMALLKNFGSSSQVSVFTKLKLFMTKFLITNIGEDQAADL-----
XP_021737780.1      DMGLLLKYEGPPTTANNRVSLALVNVNKLQTHYNQFISFF-----
XP_021726635.1      DMGLLKYEGATKTANKGVYLPFPINKVQRHFNQFLSFLKANNGNDDDEAEQ
XP_021735486.1      DMGLLLKYSSTLSVIGSSILDDDI-----
XP_021750669.1      DMGLLLKYSSTLSIIGSSILDDDI-----
                      **  ***

```

**Fig. S3.** Sequence alignment of ribosome inactivating proteins performed using the ClustalW tool (<https://embnet.vital-it.ch/software/ClustalW.html>) with default parameters. Asterisk, colon and dot are identical, conserved and semi-conserved amino acid residues, respectively. For protein information see **Table S1**. Cysteinyln residues are highlighted in red.

10 20 30 40 50 60 70 80  
 • • • • •  
 quinoiN -----ADVTFFKLEPKPTQNTYNTFLQSIQSQTKDPSLVYEGIPMRPPTNPDTYLLVDLESKKDK-NEIFVTLALSRNDL  
 PAP-alpha -----INTITFDVG-NATINKYATFMKSIHNQAKDPTLKC**Y**GI**G**IPMLPNTNLTPKYLLVLQDSS-----LKTITLMLKRNNL  
 PD-S2 -----VSTITFDVG-SATISKYTTFFLESRLNQAKDPSLKC**Y**GI**G**IPMLPNTNPNPKYLLVELNAKLSSGEVKSITLMLRRHNL  
 PD-L3/4 -----VNTITFDVG-NATINKYATFMESLRNEAKDPTLKC**Y**GI**G**IPMLPDSNLTPKYVLVLQDAS-----SKTITLMLRRNNL  
 PD-L1/2 -----INTITYDAG-NTTINKYATFMESLRNEAKDPSLQ**CY**GI**G**IPMLPNNSSTIKYLLVLQDAS-----QKTITLMLRRNNL  
 PAP-S -----INTITFDAG-NATINKYATFMESLRNEAKDPSLKC**Y**GI**G**IPMLPNTSTIKYLLVLQDAS-----LKTITLMLRRNNL  
 PAP-I -----VNTIIYNVG-STTISKYATFLNDRNEAKDPSLKC**Y**GI**G**IPMLPNTNTPNKYVLVLQDSSNK-----KTITLMLRRNNL  
 heterotepalin-4 -----VNTIIYNVG-STTISKYATFLDRLNEAKDPSLKC**Y**GI**G**IPMLPNTNPNPKYVLVLQDSSNK-----KTITLMLRRNNL  
 PAP-II -----NIVFDVE-NATPETYSNFLTSLREAVDKDKLT**CH**GMIMATTLTEQPKYVLVLQDSSGK-----TFTLAIIRGNL  
 dioicin-2 -----NIVFDVE-NATPETYSNFLTSLREAVDKDKST**CH**GMIMATTLTEQPKYVLVLQDSSGK-DAKTTFLAIIRGNL  
 saporin-6 -----VTSITLDELVNPTAGQYSSFVDKIRNNVNDPNLKYGGTDIAVIGPP-SKEKFLRINLFQSS---RGTVSLGLKRDNL  
 saporin-2 -----VTSITLDELVNPTAGQYSSFVDKIRNNVNDPNLKYGGTDIAVIGPP-SKDKFLRINLFQSS---RGTVSLGLKRDNL  
 saporin-7 -----VTSITLDELVNPTAGQYSSFVDKIRNNVNDPNLKYGGTDIAVIGPP-SKEKFLRINLFQSS---RGTVSLGLKRDNL  
 dianthin-30 -----ATAYTLNLNPSASQYSSFLDQIRNNVNDPNLKYGGTDIAVIGAPSTKDKFLRINLFQGP---RGTVSLGLRRLNL  
 saporin-5 -----VTSITLDELVNPTAGQYSSFVDKIRNNVNDPNLKYGGTDIAVIGPP-SKEKFLRINLFQSS---RGTVSLGLKRDNL  
 saporin-9 -----VTSITLDELVNPTAGQYSSFVDKIRNNVNDPNLKYGGTDIAVIGPP-SKDKFLRINLFQSS---RGTVSLGLKRDNL  
 lychnin -----RPSWTVDSDSAKYSSFLDSLREEFGRGTPKV**C**NI**P**VTKKAN-----NDKFVLVNLVLPFNRTITLAFRASDA  
 saporin-3 -----DNLKYGGTDIAVIGPP-SRDKFLRINLFQSS---RGTVSLGLKRDNL  
 MAP-S -----APTLETIASLDLNNPTTYLSFITNIRTKVADKTE**Q**TI**Q**IKSTFTQRYSYDILVSS---TQKITLAIDMADL  
 ricin IFPKQYPIINFTTAGATVQSYTNFIRAVRGRLLTTGADVVRHEIPVLPNVRVGLPINQRFILVELSN-HAELSVTLALDVTNA  
 agglutinin IFPKQYPIINFTTADATVESYTNFIRAVRSHLTTGADVVRHEIPVLPNVRVGLPISQRFILVELSN-HAELSVTLALDVTNA  
 : : : : :  
 90 100 110 120 130 140 150 160  
 • • • • •  
 quinoiN YVVAFAADKFGG---KVRGHFFSNLN---IDTIDAKAKVFEVQVQF---INITYGES**Y**S**Q**IES---NAG-TNRLSFF**L**GF**D**  
 PAP-alpha YVMGYADTYNG---KCRYHIFKDISNTTTERNDVMTTL**C**PNPSSR--VGKNINYDSS**Y**PALEK---KVGR-PRSQVQ**L**GI**Q**  
 PD-S2 YVMGYSDPYDN---KCRYHIFKDISSTTERKDVETTL**C**PNASSR--VSKNISYDSS**Y**PALEN---KAGR-SRSQVQ**L**GI**Q**  
 PD-L3/4 YVMGYSDLYNG---KCRYHIFNDITG-TESTDVENTL**C**PNSNSR--EKKAINYNSQ**Y**STLQ**N**---KAGVSSRSQVQ**L**GI**Q**  
 PD-L1/2 YVMGYSDPFNG---NCRYHIFNDITG-TERTNVENTL**C**SSSSSR--DAKPINYNS**L**YSTLEK---KAENVSRSQVQ**L**GI**Q**  
 PAP-S YVMGYSDPYDN---KCRYHIFNDIKG-TEYSDVENTL**C**PSNPR--VAKPINYNG**L**YSTLEK---KAGVTSRNEVQ**L**GI**Q**  
 PAP-I YVMGYSDPFETN-KCRYHIFNDISG-TERQDVETTL**C**PNANSR--VSKNINFDSR**Y**P**T**LES---KAGVKSRSQVQ**L**GI**Q**  
 heterotepalin-4 YVMGYSDPFDTG-KCRYHIFNDISG-TERQDVETTL**C**PNSNSR--VSKNINYDSR**Y**P**T**LES---KVGVKSRSQVQ**L**GI**Q**  
 PAP-II YLEGYSDIYNG---KCRYRIFKDES-----DAQETV**C**PGDKSKPGTQNNIPYEKS**Y**KGMES---KGA--RTKLGLGKI  
 dioicin-2 YLEGYSDIYNE---KCRYHIFEDSES-----DAQQTV**C**PGDLTLPGSQNKIPYKKS**Y**QSMES---KGGD--RTKLGLGQI  
 saporin-6 YVVAYLAMDNNTNVNRAYYFRSEITS-----AESTALFPEATAN--QKALEYTED**Y**Q**S**IEKNAQITQGDQSRKEL**L**GL**I**D  
 saporin-2 YVVAYLAMDNNTNVNRAYYFKSEITS-----AELTALFPEATAN--QKALEYTED**Y**Q**S**IEKNAQITQGDQSRKEL**L**GL**I**D  
 saporin-7 YVVAYLAMDNNTNVNRAYYFRSEITS-----AELTALFPEATAN--QKALEYTED**Y**Q**S**IEKNAQITQGDQSRKEL**L**GL**I**D  
 dianthin-30 YVVAYLAMDNANVNRAYYFKNQITS-----AELTALFPEVVAN--QKQLEYGED**Y**Q**A**IEKNAKITQGDQSRKEL**L**GL**I**N  
 saporin-5 YVVAYLAMDNNTNVNRAYYFRSEITS-----AELTALFPEATAN--QKALEYTED**Y**Q**S**IEKNAQITQGDQSRKEL**L**GL**I**D  
 saporin-9 YVVAYLAMDNNTNVNRAYYFRSEITS-----AELTALFPEATAN--HKALEYTED**Y**H**S**IEKNAQITEGDQSRKEL**L**GL**I**N  
 lychnin YLVGFQDRDSKTNKLRANFFSDEYR-----ALSGKYKSIFTDAEVLAPAL**C**AST**Y**TDLQ**N**---KAGV-SREKLS**L**GV**S**  
 saporin-3 YVVAYLAMDNANVNRAYYFGETITS-----AELTTLPEATAN--QKALEYTED**Y**Q**S**IEKNAKITEGDQSRKEL**L**GL**I**N  
 MAP-S YVLGYSDIAN---NKGRAFFFKDVTE-----AVANNFFPGATGTNR--IKLFTG**S**Y**G**DLEK---NGG--LRKDN**P**L**G**IF  
 ricin YVVGYRAGNS-----AYFFHDPNQ---EDAEAIHLFTDVQN-RYTFAGG**N**Y**D**RLEQ---LAGN-LRENIE**L**GN**G**  
 agglutinin YVVG**C**RAGNS-----AYFFHDPNQ---EDAEAIHLFTDVQN-SFTFAGG**N**Y**D**RLEQ---LGG--LRENIE**L**GT**G**  
 \*: . : \* : : : \* : : :  
 170 180 190 200 210 220 230 240  
 • • • • •  
 quinoiN NLKTYMEKVYGMDTKAKD-YSKTEAR**F**LLIAI**Q**MA**E**AR**F**K**Y**I**Q**GRAIVTTN-----PNNYKILSLENN**W**GAISKGIRN  
 PAP-alpha ILNSGIGIKYGVDSFT---EKTEA**E**FL**L**VAI**Q**MV**S**E**A**AR**F**K**Y**IENQVKTNFN--RAFYPNAKVLNLEES**W**GKIS**T**AIHN  
 PD-S2 ILNSDIGIKISGVKSFT---DKTEA**E**FL**L**VAI**Q**MV**S**E**A**TR**F**K**Y**IENQVKTNFN--RAFYPNAKVLNLEET**W**GKIS**M**AIHG  
 PD-L3/4 ILNSDIGIKISGVSTFT---DKTEA**E**FL**L**VAI**Q**MV**S**E**A**AR**F**K**Y**IENQVKTNFN--RAFNPNPVKVLSLEEN**W**GKIS**L**AIHN  
 PD-L1/2 ILSSDIGIKISGQSSFT---DKTEA**E**FL**L**VAI**Q**MV**S**E**A**AR**F**K**Y**IENQVKTNFN--RDFSNDKILDLLEN**W**GKIS**T**AIHD  
 PAP-S ILNSDIGIKISGQSSFT---EKTEA**E**FL**L**VAI**Q**MV**S**E**A**AR**F**K**Y**IENQVKTNFN--RDFSNDKVLDEEN**W**GKIS**T**AIHN  
 PAP-I ILDSNIGIKISGVMSFT---EKTEA**E**FL**L**VAI**Q**MV**S**E**A**AR**F**K**Y**IENQVKTNFN--RAFNPNPVKVNLQ**E**T**W**GKIS**T**AIHD  
 heterotepalin-4 ILSDDIGIKISGVTSFS---EKTEA**E**FL**L**VAI**Q**IS**-E**AR**F**K**Y**IENQVKTNFN--RAFNPNPVKVNLLEET**W**GKIS**T**AIHD  
 PAP-II TLKSRMGKIYKGKDATDQKQYQKNEA**E**FL**L**IAV**Q**MT**E**AS**R**F**K**YIENKVKAFFDANGYQPDPAISLEKN**V**SVSKVIAK  
 dioicin-2 TLESRMNKIYKGKDATDQKQYQKNEA**E**FL**L**IAV**Q**MT**E**AS**R**F**K**YIENKVKDSFPDAIGYKDPDKAISLET**S**W**D**KIS**T**AIK  
 saporin-6 LLSTSMEAVNKKARVVKD-----E**A**R**F**LLIAI**Q**MT**A**E**A**AR**F**RYI**Q**NLVIKNFP--NKFNSENKVIQFEVN**W**KKIS**T**AIYG  
 saporin-2 LLTTFMEAVNKKARVVKN-----E**A**R**F**LLIAI**Q**MT**A**E**V**AR**F**RYI**Q**NLVTKNFP--NKFDSDNKVIQFEV**S**W**R**KIS**T**AIYG  
 saporin-7 LLTTSMEAVNKKARVVKN-----E**A**R**F**LLIAI**Q**MT**A**E**A**AR**F**RYI**Q**NLVIKNFP--NKFNSENKVIQFEVN**W**KKIS**T**AIYG  
 dianthin-30 LLTITMIDGVNKKARVVKD-----E**A**R**F**LLIAI**Q**MT**A**E**A**AR**F**RYI**Q**NLVTKNFP--NKFDSDNKVIQFV**S**W**S**KIS**T**AI**F**G  
 saporin-5 LLTTSMEAVN

|                 | 250                                                              | 260 | 270 | 280 | 290 |
|-----------------|------------------------------------------------------------------|-----|-----|-----|-----|
| quinoiin        | A---VKKVINPALILQYPNGTTWTVTQVSDIKNDMG-LLKYVM-----                 |     |     |     |     |
| PAP-alpha       | A---KNGALTSPLELKNANGSKWIVLRVDDIEPDVG-LLKYVNGT <b>C</b> QAT-----  |     |     |     |     |
| PD-S2           | A---KNGAFSKPLELQNADGSKWIVLRVDEIKPDVA-LLKYVSGS <b>C</b> QAT-----  |     |     |     |     |
| PD-L3/4         | A---KNGALTSPLELKNADDTKWIVLRVDEIKPDMG-LLNYVSGT <b>C</b> QTT-----  |     |     |     |     |
| PD-L1/2         | A---TNGALPKPLELKNADGTKWIVLRVDEIKPDMG-LLNYVNGT <b>C</b> QTT-----  |     |     |     |     |
| PAP-S           | S---KNGALPKPLELKNADGTKWIVLRVDEIKPDVG-LLNYVNGT <b>C</b> QAT-----  |     |     |     |     |
| PAP-I           | A---KNGVLPKPLELVDASGAKWIVLRVDEIKPDVA-LLNYVSGS <b>C</b> QTTY----- |     |     |     |     |
| heterotepalin-4 | A---KNGVLPKPLELVDASGAKWIVLRVDEIKPDVA-LLNYVSGS <b>C</b> QTT-----  |     |     |     |     |
| PAP-II          | VGTSGDSTVTLPGDLKDENNKPWTTATMNDLKNDIMALLTHVT <b>C</b> KVKSSMFPEI  |     |     |     |     |
| dioicin-2       | VNTPGNSIVTLPGDLKDENVKPWTTATMDELKNDIMGLLTHVT <b>C</b> KIK-----    |     |     |     |     |
| aporin-6        | D---AKNGVFNKDYDFGFGKVRQVKDLQMGLLMYLKGPK-----                     |     |     |     |     |
| aporin-2        | D---AKNGVFNKDYDFGFGKVRQVKDLQMGLLMYLKGPKSSNEANSTAYATTVL-          |     |     |     |     |
| aporin-7        | D---AKNGVFNKDYDFGFGKVRQVKDLQMGLLMYLKGPK-----                     |     |     |     |     |
| dianthin-30     | D--- <b>C</b> KNGVFNKDYDFGFGKVRQAKDLQMGLLKYLGRPKSSSIEANSTDDTADVL |     |     |     |     |
| aporin-5        | D---AKNGVFNKDYDFGFGKVRQVKDLQMGLLMYLKGPK-----                     |     |     |     |     |
| aporin-9        | D---AKNGVFNKDYDFGFGKVRQVKDLQMGLLMHLKGPK-----                     |     |     |     |     |
| lychnin         | S--- <b>C</b> KLGGGQFTEEMKLG-----LLLYN-----                      |     |     |     |     |
| aporin-3        | D---AKNGVFNKDYDFGFGKVRQVKDLQMGLLMYLGTTPNNAADRYRAEL----           |     |     |     |     |
| MAP-S           | S---KPSTTTAT <b>C</b> QLATSPVTISPWIFKTVEEIKLVMGLLKSS-----        |     |     |     |     |
| ricin           | S---NQGAFASPIQLQRRNGSKFSVYDVSILIPIIALMVYR <b>C</b> APPPSSQF----  |     |     |     |     |
| agglutinin      | S---NQGAFASPIQLQRRNGSKFNVYDVSILIPIIALMVYR <b>C</b> APPPSSQF----  |     |     |     |     |

**Fig. S4.** Western blot analysis of quinoin (q1 and q2, 100 and 50 ng, respectively) and PD-S2, PD-L1 and PD-L4 (.1 and .2, 100 and 50 ng, respectively). Purified proteins were separated by SDS-PAGE and subjected to immunoblot analysis using anti-quinoin or anti-PD-S2 (type 1 RIP from seeds of *P. dioica*) rabbit polyclonal antibody.

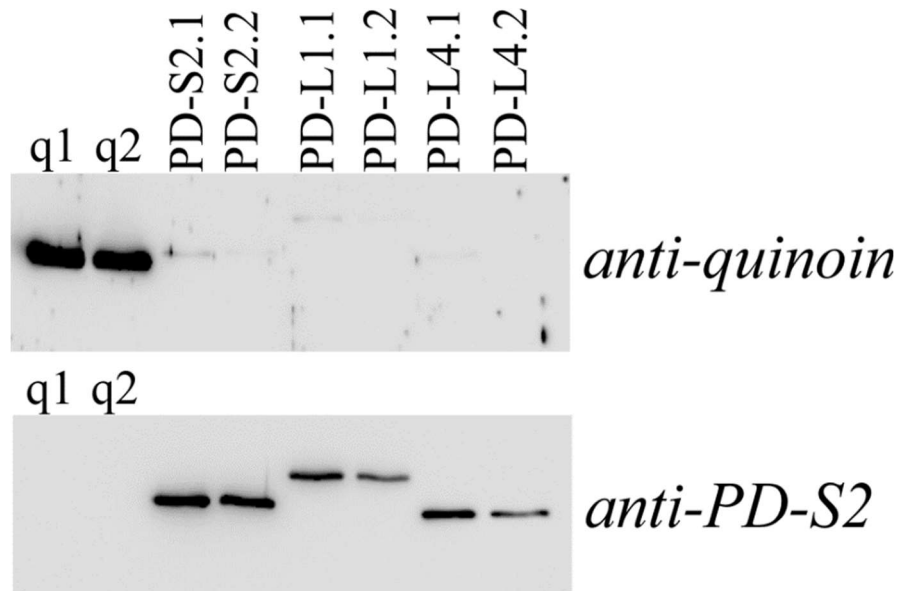

**Fig. S5.** Open Reading Frame (ORF) organization of quinoin derived from the genomic sequence NW\_018745569.1.

```

atg  caa caa gaa aat aag aag gca tgg ctt gtt ctc acg ata gct ata tgg gtc gtc ctt
M   Q  Q  E  N  K  K  A  W  L  V  L  T  I  A  I  W  V  V  L

      ▼ mature quinoin
caa cag gtt aat gca gct gat gta acc ttc aaa ctc gaa cca aaa cct aca cag aat act
Q  Q  V  N  A  A  D  V  T  F  K  L  E  P  K  P  T  Q  N  T
tat aac acc ttt ctg caa agt ata cgc agc caa act aag gat cca agc tta gtg tat gaa
Y  N  T  F  L  Q  S  I  R  S  Q  T  K  D  P  S  L  V  Y  E
gga atc cca atg atc cga cca cca acc aac cca gat aca tat ctt ttg gtt gac ctt gaa
G  I  P  M  I  R  P  P  T  N  P  D  T  Y  L  L  V  D  L  E
tct aaa aag gat aag aat gag ata ttc gtt aca ctt gct tta agt aga aac gac ttg tat
S  K  K  D  K  N  E  I  F  V  T  L  A  L  S  R  N  D  L  Y
gta gtg gcc ttt gct gat aaa ttt gga ggc aaa gtt cgc ggc cat ttc ttt tcc aat ctt
V  V  A  F  A  D  K  F  G  G  K  V  R  G  H  F  F  S  N  L
aac att gac acc att gat aag gca aag aaa gtt ttt cca gaa gtt cag gtt ttc ata aat
N  I  D  T  I  D  K  A  K  K  V  F  P  E  V  Q  V  F  I  N
ata acg tac ggg gaa agt tac agt caa atc gaa agc aat gct ggt aca aac cga tta agt
I  T  Y  G  E  S  Y  S  Q  I  E  S  N  A  G  T  N  R  L  S
ttt ccg ttg ggg ttt gat aac ctt aaa act tac atg gaa aag gtc tat ggg atg gat act
F  P  L  G  F  D  N  L  K  T  Y  M  E  K  V  Y  G  M  D  T
aag gcc aaa gat tat agc aaa act gaa gct cgg ttc cta ctc atc gcg att caa atg gtt
K  A  K  D  Y  S  K  T  E  A  R  F  L  L  I  A  I  Q  M  V
gca gag gcc gca cgt ttc aag tac atc cag ggg aga gct atc gtt act aca aat cct aac
A  E  A  A  R  F  K  Y  I  Q  G  R  A  I  V  T  T  N  P  N
aat tat aaa ata ctg tcg tta gag aac aac tgg gga gct att tcg aaa ggc att cgg aac
N  Y  K  I  L  S  L  E  N  N  W  G  A  I  S  K  G  I  R  N
gct gtt aag aaa gtc atc aat cct gcg tta att tta caa tac cct aat ggt aca aca tgg
A  V  K  K  V  I  N  P  A  L  I  L  Q  Y  P  N  G  T  T  W
aca gtt aca caa gtg agt gat ata aaa aat gat atg gga ctc ctt aag tat gtt atg taa
T  V  T  Q  V  S  D  I  K  N  D  M  G  L  L  K  Y  V  M  -

```



**Fig. S6.** Representative images of bean cotyledonary leaves infected with TNV alone (a) or TNV mixed to 2.0 or 0.2  $\mu\text{g/mL}$  of quinoin (b, c, respectively) on the adaxial leaf surface, or when inoculated separately from quinoin, the latter applied on the abaxial leaf surface (d).

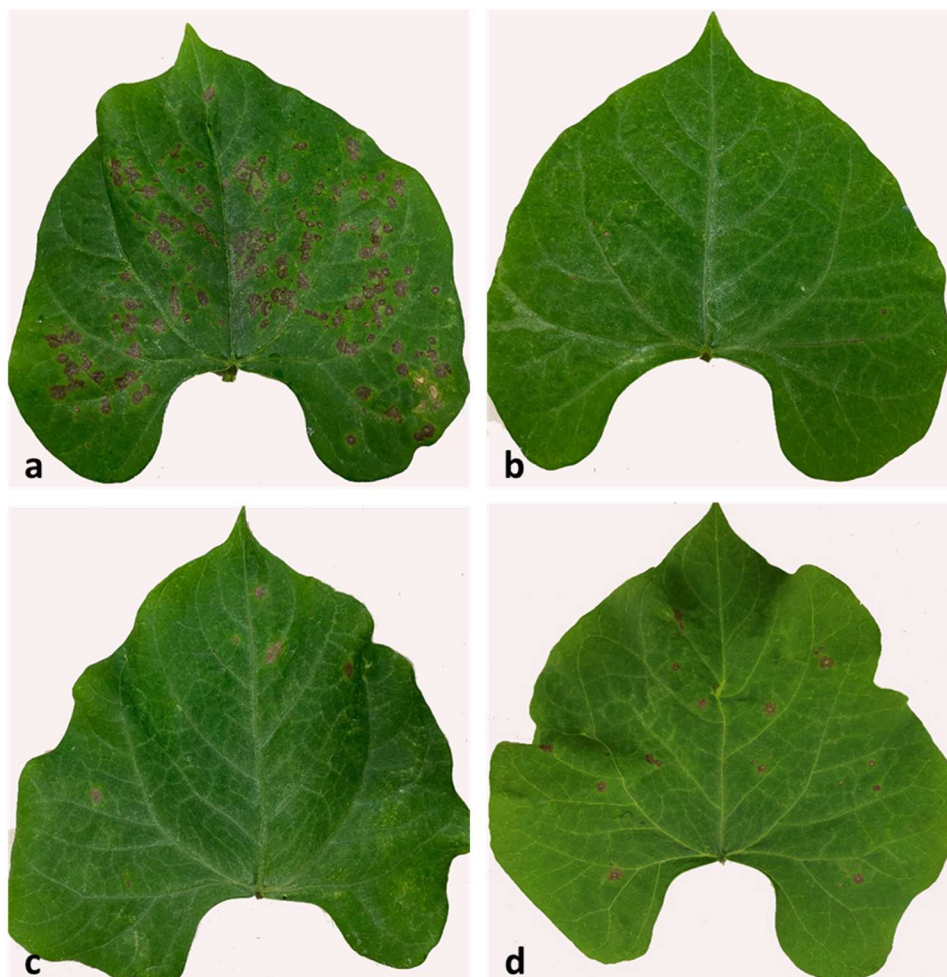

**Fig. S7.** Stereo microscopy analyses in order to evidence the antifungal effect of quinoïn at different concentrations against the plant pathogenic fungi *Cryponectria parasitica* strain E4 (a) and *C. parasitica* strain E13 (b). Water, negative control.

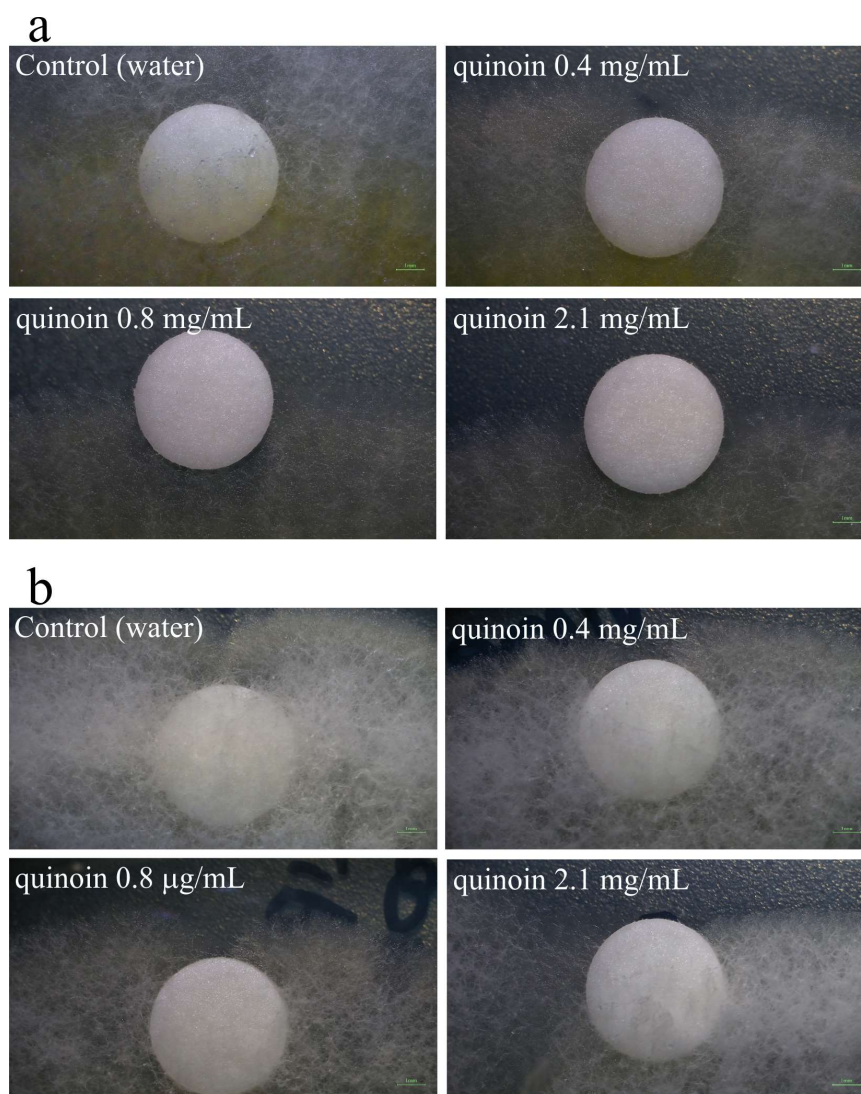

Supplement: s1 [file s1]
